# Supplementary material for: Promoting engagement by patients and families to reduce adverse events in acute care settings: a systematic review
Source: HighWire-hosted journal article supplement (doi:10.1136/bmjqs-2012-001769), 2013-12-13
Supplement: bmjqs-2012-001769supp_appendix.pdf [file bmjqs-2012-001769supp_appendix.pdf]

Legend:  
Conceptual model of engaging patient and families in patient safety in the inpatient setting.

## Promoting Engagement by Patients and Families to Reduce Adverse Events Web Appendix

Figure 1. Conceptual Model

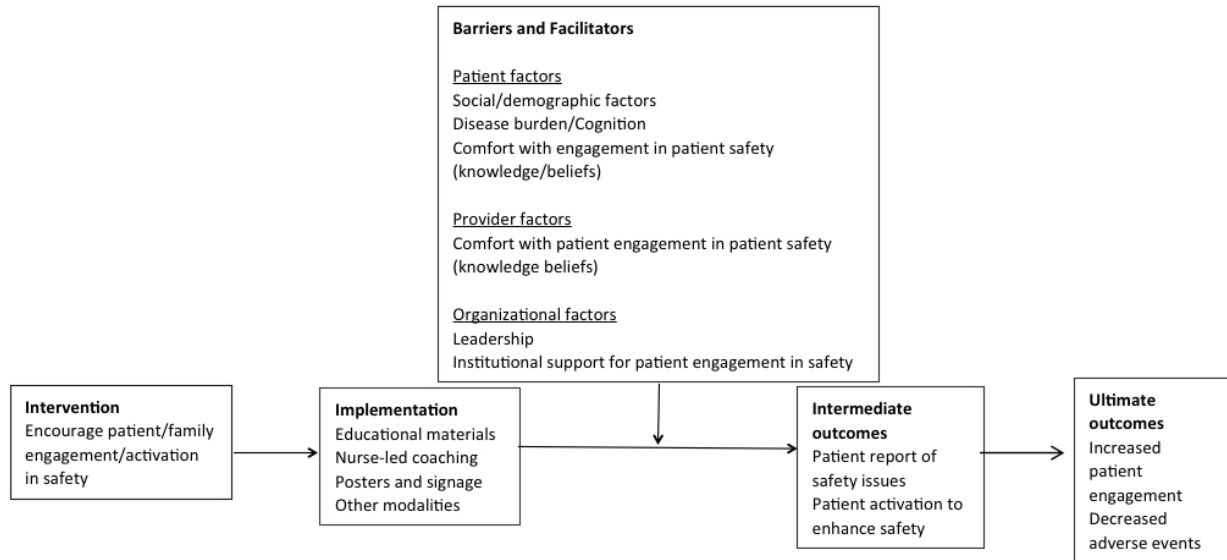

**Figure 2. Flow chart for study inclusion.**

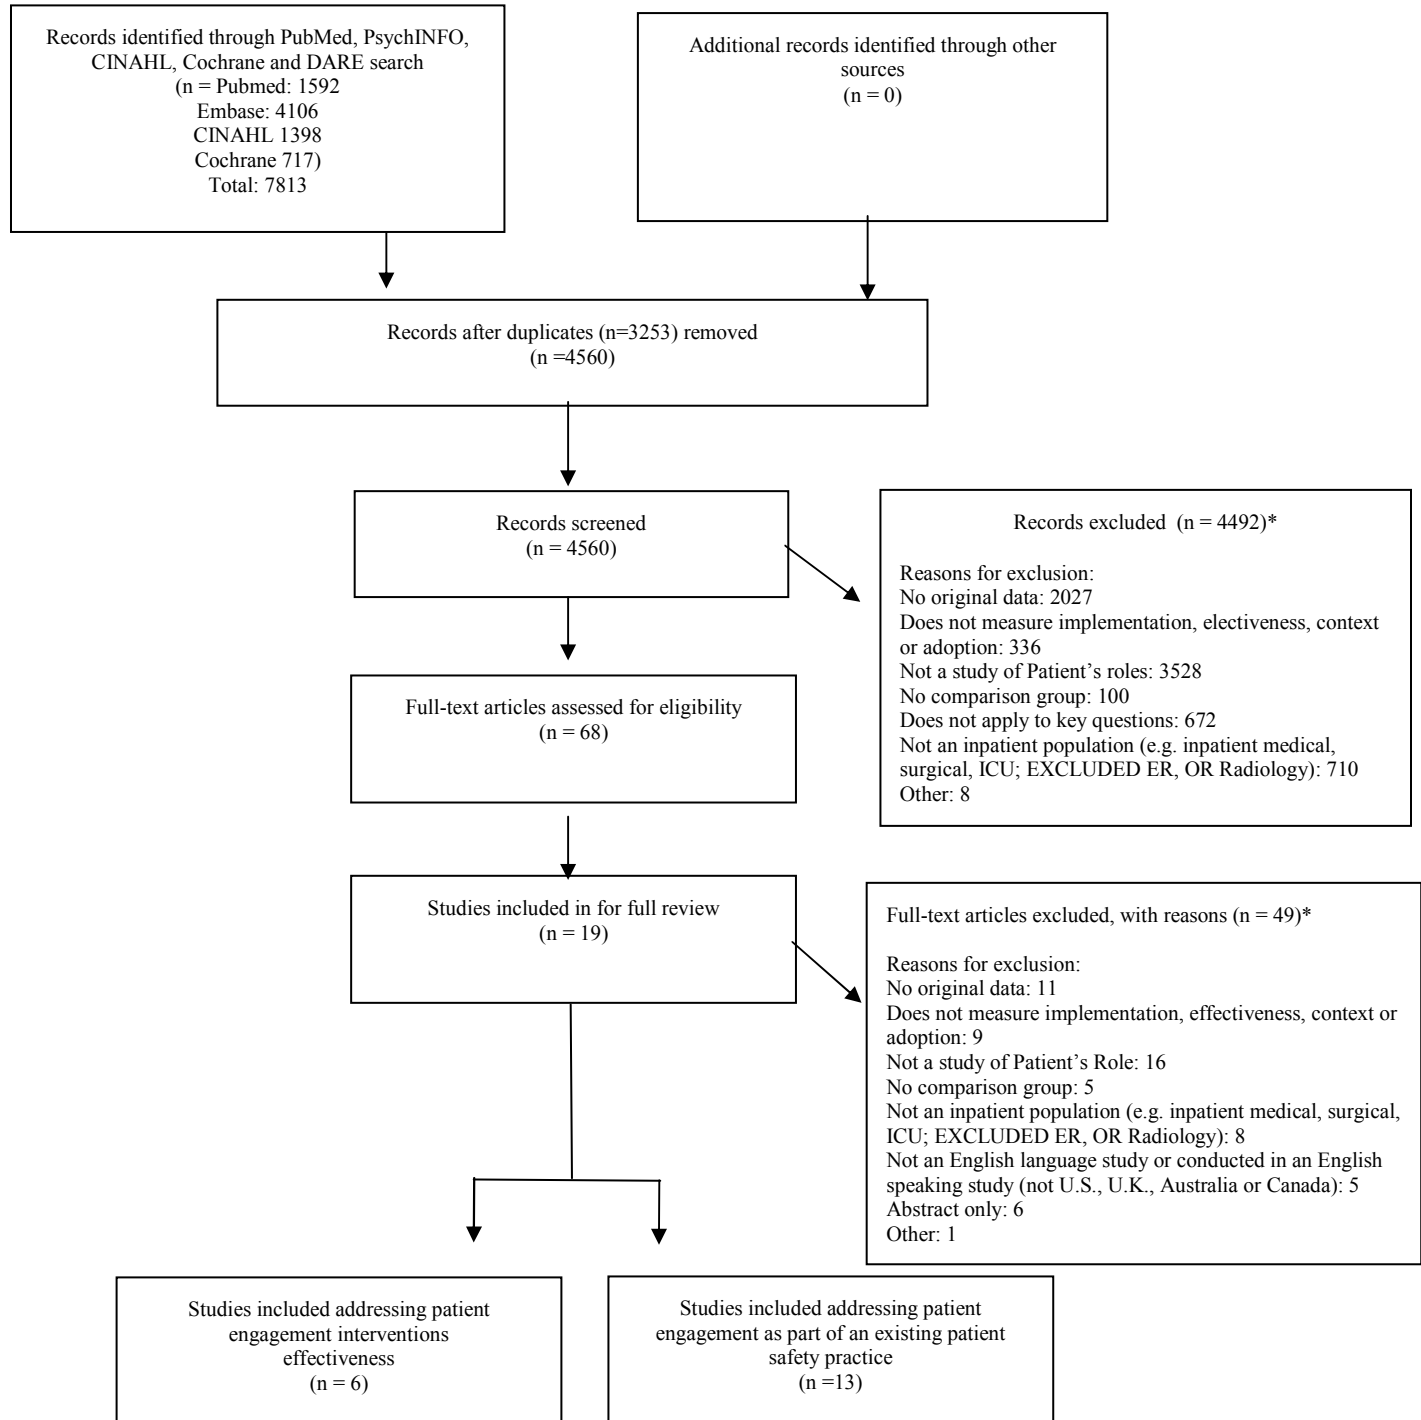

\*The total number of reasons for exclusion is higher than the total number excluded since the both reviewers did not have to cite the same reason for excluding the record or article.

## Search Strategy

### **PUBMED:**

#### **DATABASE SEARCHED & TIME PERIOD COVERED:**

PubMed – 2000-11/3/2011

#### **SEARCH STRATEGY:**

"adverse events" OR "Iatrogenic Disease/prevention and control" OR "Medical Errors/prevention and control" OR "medication errors/prevention and control" OR "Medical Errors/adverse effects" OR "Safety Management" OR "Cross Infection/prevention and control" OR "infection control"

AND

"Physician-Patient Relations" OR "Nurse-Patient Relations" OR "Patient Participation" OR "Patient Education as Topic" OR "Patient-Centered Care" OR "patient reporting" OR "patient-empowering" OR "patient empowerment" OR "patient partnership" OR "patient activation" or "patient self-effectiveness" or "patient involvement"

**NUMBER OF RESULTS: 1499**

---

---

#### **DATABASE SEARCHED & TIME PERIOD COVERED:**

PubMed – 10/1/2011-11/3/2012

#### **SEARCH STRATEGY:**

"Physician-Patient Relations" OR "Nurse-Patient Relations" OR "Patient Participation" OR "Patient Education as Topic" OR "Patient-Centered Care" OR "patient reporting" OR "patient-empowering" OR "patient empowerment" OR "patient partnership" OR "patient activation" or "patient self-effectiveness" or "patient involvement"

AND

adverse events" OR "Iatrogenic Disease/prevention and control" OR "Medical Errors/prevention and control" OR "medication errors/prevention and control" OR "Medical Errors/adverse effects" OR "Safety Management" OR "Cross Infection/prevention and control" OR "infection control"

**NUMBER OF RESULTS: 93**

---

---

#### **DATABASE SEARCHED & TIME PERIOD COVERED:**

PubMed – 10/1/2011-11/3/2012

#### **“RELATED ARTICLE” SEARCHES ON THE FOLLOWING ARTICLES:**

J Patient Saf. 2012 Dec;8(4):182-8.

Patient Involvement in Patient Safety: The Health-Care Professional's Perspective.

Davis RE, Sevdalis N, Vincent CA.

Soc Sci Med. 2012 Jul;75(2):257-63. Epub 2012 Apr 13.

Patients' willingness and ability to participate actively in the reduction of clinical errors: a systematic literature review.

Doherty C, Stavropoulou C.

**NUMBER OF COMBINED RESULTS AFTER REMOVING DUPLICATES: 43**

---

---

### **CINAHL**

**DATABASE SEARCHED & TIME PERIOD COVERED:**

CINAHL – 2000-10/24/2011

**SEARCH STRATEGY:**

(TI (Physician n3 Patient n3 relation\*) OR (Nurse n3 Patient n3 relation\*) OR Patient n3 Participat\* OR Patient n3 Education OR "Patient-Centered Care" OR "patient reporting" OR patient n2 empower\* OR patient n3 partner\* OR "patient activation" OR "patient self-effectiveness" OR patient n3 involv\* OR AB (Physician n3 Patient n3 relation\*) OR (Nurse n3 Patient n3 relation\*) OR Patient n3 Participat\* OR Patient n3 Education OR "Patient-Centered Care" OR "patient reporting" OR patient n2 empower\* OR patient n3 partner\* OR "patient activation" OR "patient self-effectiveness" OR patient n3 involv\* OR MW (Physician n3 Patient n3 relation\*) OR (Nurse n3 Patient n3 relation\*) OR Patient n3 Participat\* OR Patient n3 Education OR "Patient-Centered Care" OR "patient reporting" OR patient n2 empower\* OR patient n3 partner\* OR "patient activation" OR "patient self-effectiveness" OR patient n3 involv\*) AND

'adverse events' OR 'iatrogenic disease' OR 'medical errors' OR 'medication errors' OR 'medication error' OR 'medical error' OR ('cross infection' AND prevent\*) OR 'safety management' OR 'infection control'

---

---

**NUMBER OF RESULTS: 1283**

**DATABASE SEARCHED & TIME PERIOD COVERED:**

CINAHL – 10/1/2011-10/31/2012

**SEARCH STRATEGY:**

TI OR MW OR AB( (Physician n3 Patient n3 relation\*) OR (Nurse n3 Patient n3 relation\*) OR Patient n3 Participat\* OR Patient n3 Education OR "Patient-Centered Care" OR "patient reporting" OR patient n2 empower\* OR patient n3 partner\* OR "patient activation" OR "patient self-effectiveness" OR patient n3 involv\* )

AND

'adverse events' OR 'iatrogenic disease' OR 'medical errors' OR 'medication errors' OR 'medication error' OR 'medical error' OR ('cross infection' AND prevent\*) OR 'safety management' OR 'infection control'

**NUMBER OF RESULTS: 115**

---

---

**EMBASE**

**DATABASE SEARCHED & TIME PERIOD COVERED:**

Embase – 2000-10/27/2011

**SEARCH STRATEGY:**

'physician-patient relations' OR 'nurse-patient relations' OR 'patient participation' OR 'patient education' OR 'patient-centered care' OR 'patient reporting' OR 'patient-empowering' OR 'patient empowerment' OR 'patient partnership' OR 'patient activation' OR 'patient self-effectiveness' OR 'patient involvement' OR 'doctor patient relation'

AND

'adverse events' OR 'iatrogenic disease' OR 'medical errors' OR 'medication errors' OR 'medication error' OR 'medical error' OR 'cross infection' AND prevent\* OR 'safety management' OR 'infection control'

**NUMBER OF RESULTS: 2869**

---

---

**DATABASE SEARCHED & TIME PERIOD COVERED:**

Embase – 10/1/2011-10/31/2012

**SEARCH STRATEGY:**

'physician-patient relations'/exp OR 'physician-patient relations' OR 'nurse-patient relations'/exp OR 'nurse-patient relations' OR 'patient participation'/exp OR 'patient participation' OR 'patient education'/exp OR 'patient education' OR 'patient reporting' OR 'patient-empowering' OR 'patient empowerment' OR 'patient partnership' OR 'patient activation' OR 'patient self-effectiveness' OR 'patient involvement'/exp OR 'patient involvement' OR 'doctor patient relation'/exp OR 'doctor patient relation'

AND

'adverse events' OR 'iatrogenic disease'/exp OR 'iatrogenic disease' OR 'medical errors'/exp OR 'medical errors' OR 'medication errors'/exp OR 'medication errors' OR 'medication error'/exp OR 'medication error' OR 'medical error'/exp OR 'medical error' OR ('cross infection'/exp OR 'cross infection' AND prevent\*) OR 'safety management'/exp OR 'safety management' OR 'infection control'/exp OR 'infection control'

( 'patient centered' AND care) OR 'patient centered care'

AND

'adverse events' OR 'iatrogenic disease'/exp OR 'iatrogenic disease' OR 'medical errors'/exp OR 'medical errors' OR 'medication errors'/exp OR 'medication errors' OR 'medication error'/exp OR 'medication error' OR 'medical error'/exp OR 'medical error' OR ('cross infection'/exp OR 'cross infection' AND prevent\*) OR 'safety management'/exp OR 'safety management' OR 'infection control'/exp OR 'infection control'

**NUMBER OF RESULTS: 1,237**

---

**DATABASE SEARCHED & TIME PERIOD COVERED:**

Cochrane Databases– 2000-11/9/2011

**SEARCH STRATEGY:**

"'physician-patient relations' OR 'nurse-patient relations' OR 'patient participation' OR 'patient education' OR 'patient-centered care' OR 'patient reporting' OR 'patient-empowering' OR 'patient empowerment' OR 'patient partnership' OR 'patient activation' OR 'patient self-effectiveness' OR 'patient involvement' OR 'doctor patient relation' OR 'physician-patient relation' in Title, Abstract or Keywords

AND

adverse OR iatrogenic OR error\* OR harm\* OR safe\* OR (infection\* AND prevent\*) OR (infection\* AND control\*) in Title, Abstract or Keywords

**NUMBER OF RESULTS: 7 (Cochrane Reviews [1] Other Reviews [0] | Clinical Trials [5] | Methods Studies [1] | Technology Assessments [0] | Economic Evaluations [0] Cochrane Groups [0])**

---

**DATABASE SEARCHED & TIME PERIOD COVERED:**

Cochrane Databases– 2000-11/9/2011

**SEARCH STRATEGY:**

MeSH descriptor Physician-Patient Relations, this term only OR MeSH descriptor Patient Education as Topic, this term only OR MeSH descriptor Patient Participation explode all trees

AND

MeSH descriptor Safety Management, this term only OR drug toxicity OR MeSH descriptor Medical Errors explode all trees OR MeSH descriptor Infection explode all trees with qualifier: PC (Prevention & Control)

**NUMBER OF RESULTS: 81 (Cochrane Reviews [5] | Other Reviews [4] | Clinical Trials [71] | Methods Studies [0] | Technology Assessments [0] | Economic Evaluations [1] | Cochrane Groups [0])**

---

**DATABASE SEARCHED & TIME PERIOD COVERED:**

Cochrane Databases – 10/1/2011-10/31/2012

**SEARCH STRATEGY:**

'physician-patient relations' or 'nurse-patient relations' or 'patient participation' or 'patient education' or 'patient-centered care' or 'patient reporting' or 'patient-empowering' or 'patient empowerment' or 'patient partnership' or 'patient activation' or 'patient self-effectiveness' or 'patient involvement' or 'doctor patient relation' or 'physician-patient relation':ti,ab,kw

AND

adverse or iatrogenic or error\* or harm\* or safe\* or (infection\* and prevent\*) or (infection\* and control\*):ti,ab,kw

**NUMBER OF RESULTS: 1,636**

**Cochrane Reviews (636)**

**Other Reviews (2)**

**Trials (968)**

**Methods Studies (25)**

**Technology Assessments (2)**

**Economic Evaluations (3)**

## Patient and Family Engagement: Methods

### PICOTS

| Elements     |                                                                                                                           |
|--------------|---------------------------------------------------------------------------------------------------------------------------|
| Population   | Patients in inpatient healthcare settings (adult and pediatric) and their family members                                  |
| Intervention | Any intervention to encourage patient and/or family involvement in safety, including reporting adverse outcomes or errors |
| Comparator   | Usual practice                                                                                                            |
| Outcomes     | Effectiveness of the intervention                                                                                         |
| Timing       | Before and after the intervention                                                                                         |
| Settings     | Hospitals                                                                                                                 |

### Inclusion/exclusion criteria:

- Only English-language studies from the US, UK, Canada, and Australia were included in the present review, due to potentially significantly different cultural issues in patient engagement in their health care outside of these countries, as well as potential differences in tools for promoting engagement.
- Included studies were required to focus on hospital care settings (e.g., intensive care units) – patient engagement in safety in the home setting would be difficult to differentiate from patient self-management of their medications and care, when providers are not present.
- Only systematic reviews focusing on effectiveness and prospective, controlled studies were included.
